# Supplementary material for: Bacterial Diversity and Antibiotic Resistance Genes Associated with the Different Farming Systems of Black Tiger Shrimp (Penaeus monodon) in Bangladesh
Source: Hindawi journal article supplement (doi:10.1155/2023/6255586), 2023-08-30
Supplement: f1 [file 6255586.f1.docx]

**Title of the manuscript: Bacterial diversity and antibiotic-resistant genes associated with the different farming systems of black tiger shrimp (*Penaeus monodon*) in Bangladesh**

**Md. Zakariaa, Santonu K. Sanyalb,c, Md. Inja-Mamun Haquea*, Shankar Chandra Mandala, Kozo Watanabed,e and Anwar Hossaina,d***

a Department of Fisheries, University of Dhaka, Dhaka-1000, Bangladesh

b Department of Microbiology, Jagannath University, Dhaka-1100, Bangladesh

c School of Earth, Atmosphere and Environment, Monash University, Clayton, Victoria, 3800,

Australia

d Center for Marine Environmental Studies (CMES), Ehime University, Bunkyo-Cho 2-5, Matsuyama, Ehime 790-8577, Japan

e Department of Civil and Environmental Engineering, Ehime University, Bunkyo-Cho 3, Matsuyama 790-8577, Japan

Md. Inja-Mamun Haque and Anwar Hossain contribute equally, and both should be considered as corresponding authors.

***Corresponding author:** Md. Inja-Mamun Haque, Department of Fisheries, University of Dhaka, Dhaka-1000, Bangladesh, E-mail: [injamamunhaque@du.ac.bd](mailto:injamamunhaque@du.ac.bd)

TABLE S1: Environmental parameter (water) and sample related information of four different farming systems

| **Farming system** | **Label for the pond** | **Label for individual sample** | **Temp. (℃)** | **pH** | **Conductivity (mS/cm)** | **Turbidity**  **(NTU)** | **Sediment collecting depth** | **DO (mg/L)** | **TDS (g/L)** | **Salinity (ppt)** | **Length (cm)** | **Weight (gm)** | **Carapace length (cm)** | **Feed type** | **Sample (shrimp)** |
| --- | --- | --- | --- | --- | --- | --- | --- | --- | --- | --- | --- | --- | --- | --- | --- |
| Cluster | K-1 | SG.1  SW.1  SS.1 | 26.6 | 7.99 | 2.05 | 209 | 1.53 | 4.96 | 1.31 | 1.04 | 18.5 | 44.17 | 5.5 | Homemade feed (Boro Danga Model Feed), Apply probiotic (pond care) | **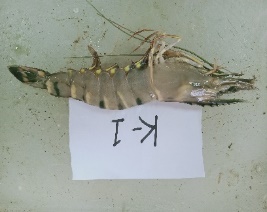** |
| K-2 | SG.2  SW.2  SS.2 | 26.6 | 8.14 | 1.84 | 216 | 1.52 | 5.83 | 1.18 | 0.93 | 20.4 | 36.72 | 5.2 | Homemade feed (Boro Danga Model Feed), Apply probiotic (pond care) | **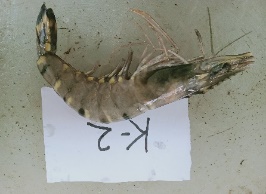** |
| K-3 | SG.3  SW.3  SS.3 | 25.87 | 7.76 | 1.33 | 440 | 1.51 | 4.58 | 0.853 | 0.66 | 21.4 | 35.17 | 4.5 | Homemade feed (Boro Danga Model Feed), Apply probiotic (pond care) | **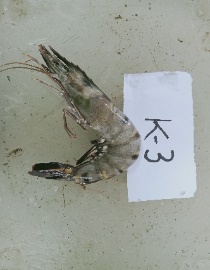** |
| Extensive | S-2 | SG.4  SW.4  SS.4 | 27.7 | 8.60 | 2.31 | 190 | 2.12 | 8.26 | 1.51 | 1.18 | 15.5 | 22.95 | 4.5 | Organic fertilizer, MOC, No probiotic treatment | 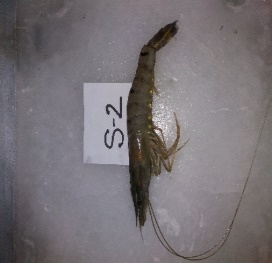 |
| S-6 | SG.5  SW.5  SS.5 | 26.45 | 8.64 | 3.64 | 385 | 2.02 | 7.43 | 2.33 | 1.91 | 15.1 | 16.59 | 3.5 | Organic fertilizer, MOC, No probiotic treatment | **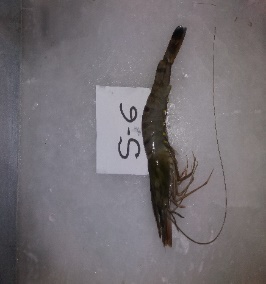** |
| K-9 | SG.6  SW.6  SS.6 | 29.03 | 8.28 | 10.8 | 275 | 2.12 | 6.69 | 6.72 | 6.13 | 17.1 | 24.40 | 4.9 | Organic fertilizer, MOC, No probiotic treatment | **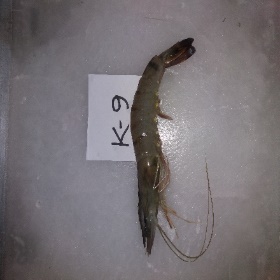** |
| Semi-intensive | K-4 | SG.7  SW.7  SS.7 | 27.41 | 7.97 | 9.58 | 202 | 1.75 | 7.06 | 6.03 | 5.37 | 15.2 | 27.40 | 4.1 | Commercial shrimp feed (CP feed), Apply probiotic (superbiotic) | 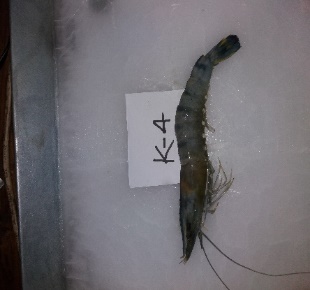 |
| K-5 | SG.8  SW.8  SS.8 | 29.36 | 8.64 | 10.6 | 219 | 1.75 | 13.15 | 6.57 | 5.97 | 21.2 | 55.15 | 6.1 | Commercial shrimp feed (CP feed), Apply probiotic (superbiotic) | **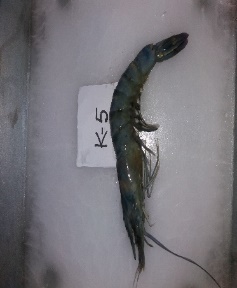** |
| S-9 | SG.9  SW.9  SS.9 | 27.81 | 8.9 | 3.64 | 155 | 1.76 | 7.6 | 2.33 | 1.91 | 13.3 | 12.17 | 3.2 | Commercial shrimp feed (CP feed), Apply probiotic (superbiotic) | **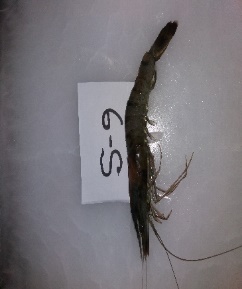** |
| Improved extensive | S-3 | SG.10  SW.10  SS.10 | 27.73 | 8.41 | 2.30 | 184 | 1.51 | 8.16 | 1.47 | 1.14 | 21.5 | 40.04 | 5.8 | Sinking feed, urea, phosphate,  No probiotic treatment | 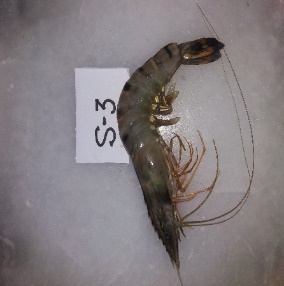 |
| S-10 | SG.11  SW.11  SS.11 | 26.98 | 8.15 | 2.71 | 366 | 1.52 | 5.93 | 1.73 | 1.4 | 17.3 | 33.26 | 5.4 | Sinking feed, urea, phosphate,  No probiotic treatment | **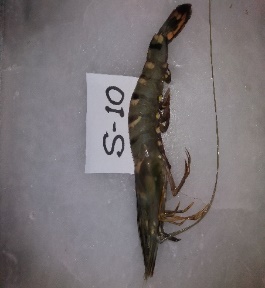** |
| K-6 | SG.12  SW.12  SS.12 | 28.9 | 8.67 | 4.63 | 79.9 | 1.54 | 9.28 | 2.96 | 2.47 | 17.1 | 25.72 | 5.1 | Sinking feed, urea, phosphate,  No probiotic treatment | **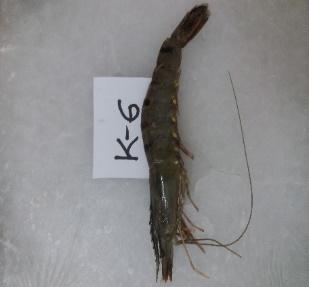** |

TABLE S2: Antibiotics usage in shrimp aquaculture of Bangladesh

| **Antibiotics** | **Purpose of Use** | **Farming type** | **Reference** |
| --- | --- | --- | --- |
| Ciprofloxacin | Bacterial infection | Semi-intensive | [1, 2] |
| Oxytetracycline | Bacterial infection | Extensive and Semi-intensive | [1-4] |
| Erythromycin | Bacterial infection | Semi-intensive | [1, 2, 17] |
| Sulfamethoxazole | Bacterial infection | Semi-intensive | [1-4] |
| Amoxicillin | Bacterial infection | Semi-intensive | [4] |
| Chlortetracycline | Bacterial infection | Semi-intensive | [4] |
| Trimethoprim | Bacterial infection | Semi-intensive | [5] |
| Sulfadiazine &  Trimethoprim (Sulfatrim) | Bacterial infection | Semi-intensive | [4] |
| Sulfamethoxazole +  Trimethoprim (Cotrim-Vet or Cotrim-Vet bolus) | Bacterial infection | Semi-intensive | [4] |

TABLE S3: Antibiotics resistant bacteria in shrimp aquaculture of Bangladesh

| **Resistant Bacteria** | **Resistant Antibiotics** | **Reference** |
| --- | --- | --- |
| *Acinetobacter venetianus, Aeromonas caviae, Pseudomonas monteilii, Shewanella algae, Vibrio alginolyticus, V. brasiliensis, V. natriegens, V. parahaemolyticus, V. shilonii, V. xuii, Zobellella denitrificans, Bacillus licheniformis and B. pumilus* | Ampicillin, Azithromycine, Chloramphenicol, Ciprofloxacine, Ceftriaxone, Erythromycine, Gentamycin, Sulphamethoxazole-Trimethoprime, Trimethoprime, Penicillin G, Tetracycline and Ceftazidime | [6] |
| *Aeromonas hydrophi, Photobacterium damselae subsp. damselae, Vibrio fluvialis, V. vulnificus, V. azureus and V. parahaemolyticus, V. xuii, V. cholerae* | Amoxycillin, Ampicillin, Erythromycin and Polymyxin B | [7] |
| *V.  parahaemolyticus* | Ampicillin, Chloramphenicol, Erythromycin, Gentamicin, Nitrofurantoin,  Oxolinic Acid, Tetracycline, Ciprofloxacin, Polymyxin B | [8] |
| *Proteus penneri, Proteus alimentorum, Morganella morganii, Enterobacter hormaechei subsp. xiangfangensis and Plesiomonas shigelloides* | Ampicillin, Ciprofloxacin, Gentamicin,  Nitrofurantoin, Levofloxacin, Chloramphenicol  Tetracycline, Azithromycin, Trimethoprim | [9] |
| *Bacillus sp., Pseudomonas sp., Acinetobacter sp. Enterobacter sp. and Microvirgula sp.* | Ampicillin and Tetracycline | [10] |

TABLE S4: PCR thermal cycle and time profile for antibiotic-resistant genes used in this study

| **Resistant gene** | **Primer name** | **Primer Sequence 5´-3´** | **Time and Temperature (℃) profile** | | | | | **Number of cycles** | **Amplicon size** | **Reference** |
| --- | --- | --- | --- | --- | --- | --- | --- | --- | --- | --- |
| **Initial**  **denaturation** | **Denaturation** | **Annealing** | **Extension** | **Final extension** |
| *cfr* | cfr-F  cfr-R | F:5´-TGA AGT ATA AAG CAG GTT GGG AGT CA-3´  R:5´-ACC ATA TAA TTG ACC ACA AGC AGC-3´ | 94/3m | 94/30s | 59/30s | 72 for 3 min | 72 for 7 min | 34 | 746 | [11] |
| *cat* | cat-F  cat-R | F:5'-GGAC TGAGTGTAAGTCTGAC-3'  R:5'-CCATACCGTTGCGT ATCAC-3' | 95/3m | 95/30s | 57/2m | 72/90sec | 72/12m | 35 | 540 | [12] |
| *Sul1* | sul1-F  sul1-R | F: 5′-CGGCGTGGGCTACCTGAACG-3′  R: 5′-GCCGATCGCGTGAAGTTCCG-3' | 94/3 m | 94/1m | 55/30s | 72/1.5m | 72/5m | 30 | 238 | [13] |
| *Sul3* | sul3-F  sul3-R | F:5′-TCAAAGCAAAATGATATGAGC-3′  R:5′-TTTCAAGGCATCTGATAAAGAC-3′ | 94/5m | 94/15s | 69/30s | 72/60s | 72/7m | 30 | 433 | [14] |
| *qnrA* | qnrA-F  qnrA-R | F:5´-AGAGGATTTCTCACGCCAGG-3´  R:5´-TGCCAGGCACAGATCTTGAC-3´ | 94/5m | 94/30s | 55/60s | 72/60s | 72/7m | 30 | 787 | [15] |
| *gyrA* | gyrA-F  gyrA-R | F:5´-AAATCTGCCCGT GTCGTTGGT-3´  R:5´-GCCATACCTACGGCGATACC-3´ | 95/5m | 95/15s | 62/30s | 72/30s | 72/3m | 40 | 124 | [16] |
| *gyrA (C)* | gyrA-F  gyrA-R | F:5´-CGA CCT TGC GAG AGA AAT-3´  R:5´-GTT CCA TCA GCC CTT CAA-3´ | 97/5m | 94/1.5m | 63/30s | 72/1m | 72/5m | 40 | 285 | [17] |
| *aacA1* | aacA1-F  aacA1-R | F:5´-ACCTACTCCCAACATCAGCC-3´  R:5´-ATATAGATCTCACTACGCGC-3´ | 94/3m | 94/30s | 57.5/45s | 72/1m | 72/10m | 35 | 200 | [18] |
| *tetA* | tetA-F  tetA-R | F:5´-GCT ACA TCC TGC TTG CCT TC-3´  R:5´-CAT AGA TCG CCG TGA AGA GG-3´ | 94/5m | 94/45s | 59/30s | 72/45s | 72/10m | 35 | 210 | [19] |
| *tetC* | tetC-F  tetC-R | F:5´-CTT GAG AGC CTT CAA CCC AG-3´  R:5´-ATG GTC GTC ATC TAC CTG CC-3´ | 94/5m | 94/45s | 60.5/30s | 72/45s | 72/10m | 35 | 418 | [19] |
| *tet 32* | tet32-F  tet32-R | F:5´GAACCAGATGCTGCTCTT-3´  R:5´-CATAGCCACGCCCACATGAT-3´ | 94/5m | 94/30s | 59.15/30s | 72/30s | 72/7m | 35 | 149 | [20] |
| *tet X* | tetX-F  tetX-R | F:5´-CAA TAA TTG GTG GTG GAC CC-3´  R:5´-TTC TTA CCT TGG ACA TCC CG-3´ | 94/5m | 94/30s | 58.5/30s | 72/30s | 72/7m | 35 | 468 | [19] |
| *blaTem-1* | blaTem-1-F  blaTem-1-R | F:5´ATA AAA TTC TTG AAG AC-3´  R:5´-TTACCAATGCTTAATCA-3´ | 95/5m | 95/1m | 46/60s | 72/1m | 72/10m | 35 | 132-151 | [21] |
| *mecA* | mecA-F  mecA-R | F:5´-TCC AGA TTA CAA CTT CAC CAG G-3´  R:5´-CCA CTT CAT ATC TTG TAA CG-3´ | 96/5m | 95/45s | 56/45s | 72/2m | 72/5m | 30 | 162 | [22] |
| *ermB* | ermB-F  ermB-R | F:5´-CTA TCT GAT TGT TGA AGA AGG ATT-3´  R:5´-GTT TAC TCT TGG TTT AGG ATG AAA-3´ | 96/5m | 95/45s | 61/45s | 72/2m | 72/5m | 30 | 142 | [22] |
| *ere(A)* | ere(A)-F  ere(A)-R | F:5´- GCC GGT GCT CAT GAA CTT GAG-3´  R:5´- CGA CTC TAT TCG ATC AGA GGC-3´ | 94/5m | 94/45s | 56.5/45s | 72/45s | 72/10m | 30 | 177 | [17] |
| *bacA* | bacA-F  bacA-R | F:5´-TTATTCATGAGCGATATGCACTC  GCTGCTGATAGC-3´  R:5´-GCCTCTGCAGTCGTTGACAACGC  CAAGCATCCGAC-3´ | 95/5m | 95/30s | 71/45s | 72/30s | 72/5m | 30 | 245 | [23] |
| *vanR* | vanR-F  vanR-R | F:5´-AGCGATAAAATACTTATTGTGGA-3´  R:5´- CGGATTATCAATGGTGTCGTT-3´ | 94/3m | 94/30s | 57/2m | 72/2m | 72/6m | 40 | 645 | [24] |
| *dfrA1* | dfrA1-F  dfrA1-R | F:5´-ACGGATCCTGGCTGTTGGTTGGACGC-3´  R:5´-CGGAATTCACCTTCCGGCTCGATGT--3´ | 94/3m | 94/30s | 70/30s | 72/1m | 72/5m | 30 | 257 | [25] |

TABLE S5: PCR product visualization under agarose gel electrophoresis of the some representative genes

| **Gene name** | **Amplicon size** | **PCR products visualization** |
| --- | --- | --- |
| **tetA** | **210** | 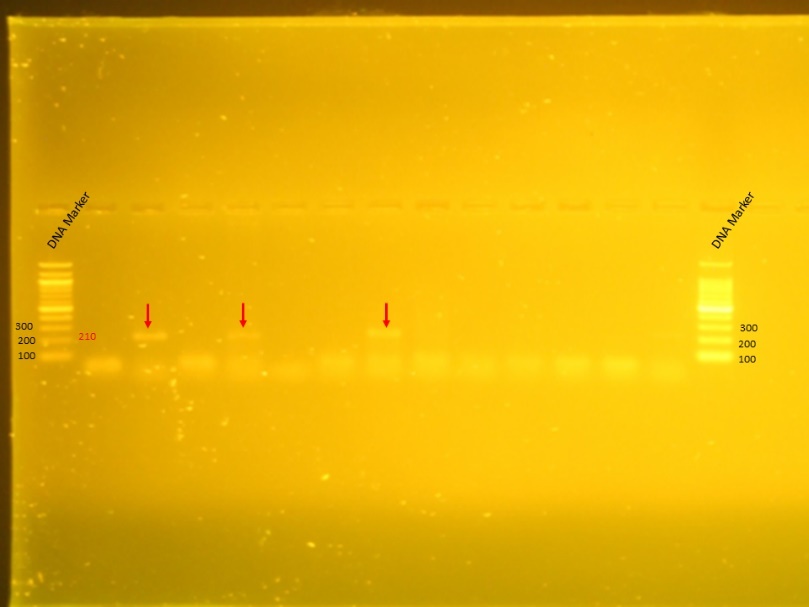 |
| **tetC** | **418** | 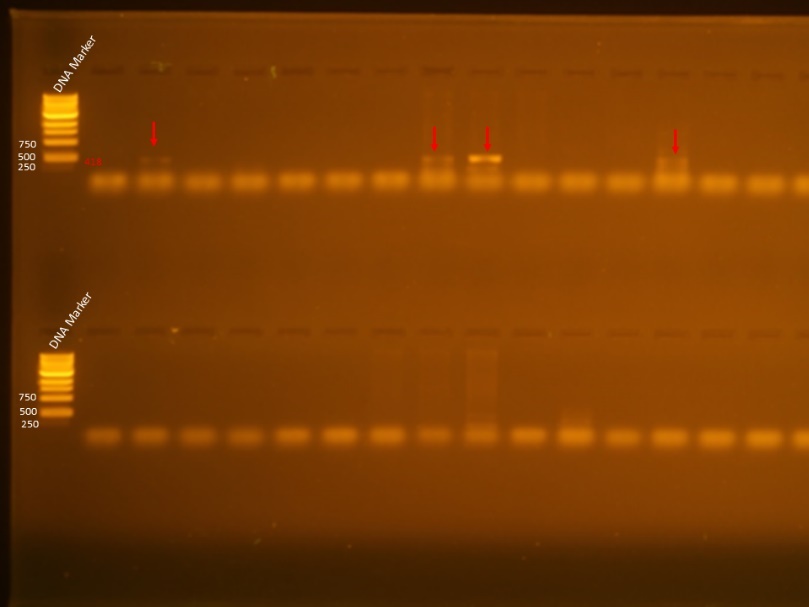 |
| **sul1** | **238** | 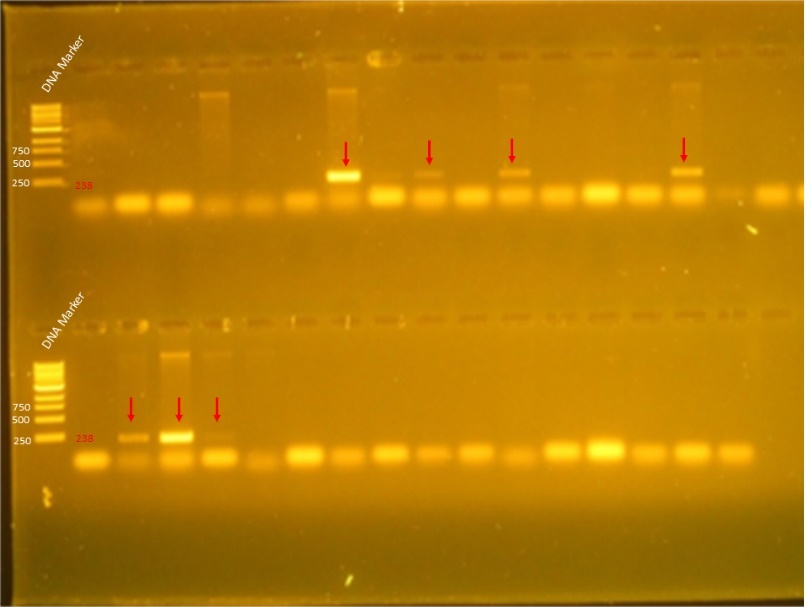 |
| **tetX** | **468** | 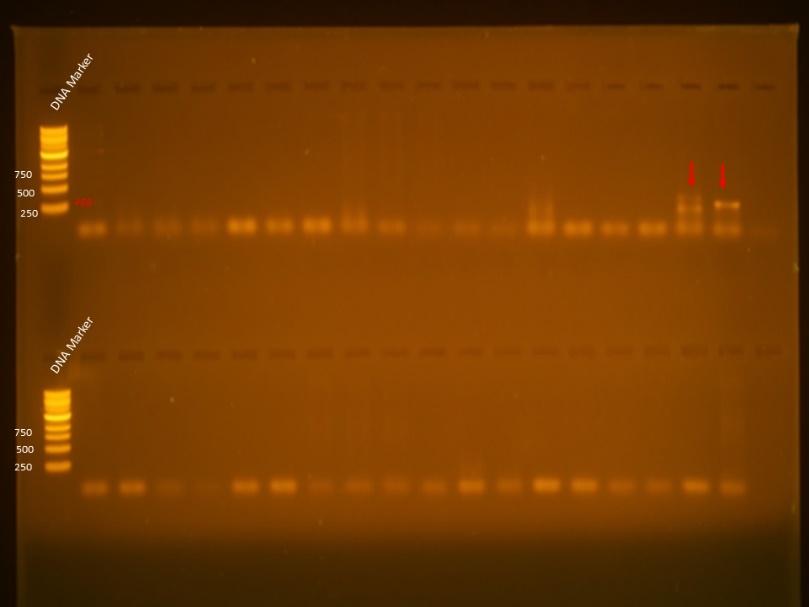 |
| **gyrA(C)** | **285** | 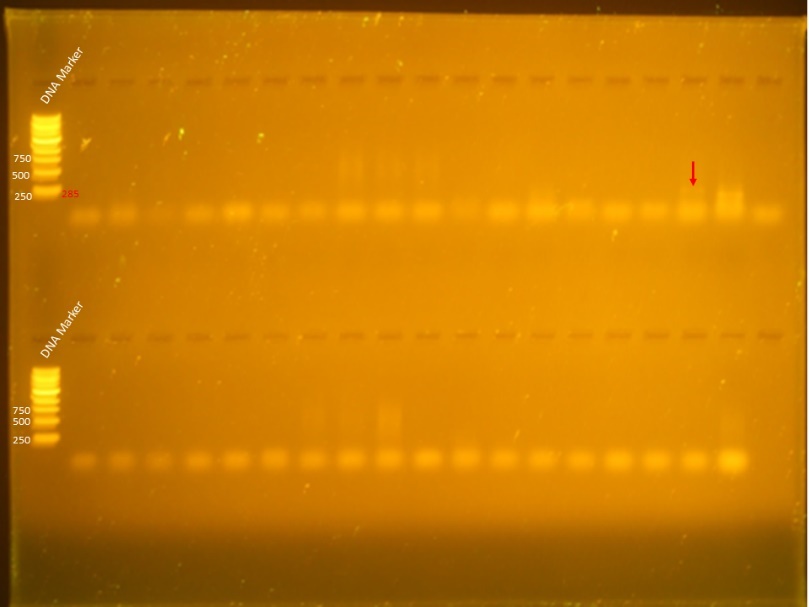 |
| **ere(A)** | **177** | 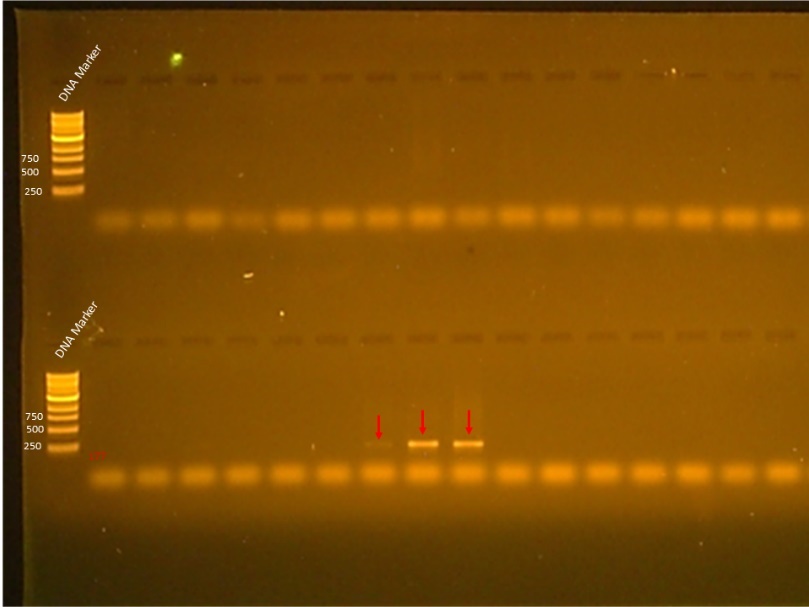 |
| **vanR** | **645** | 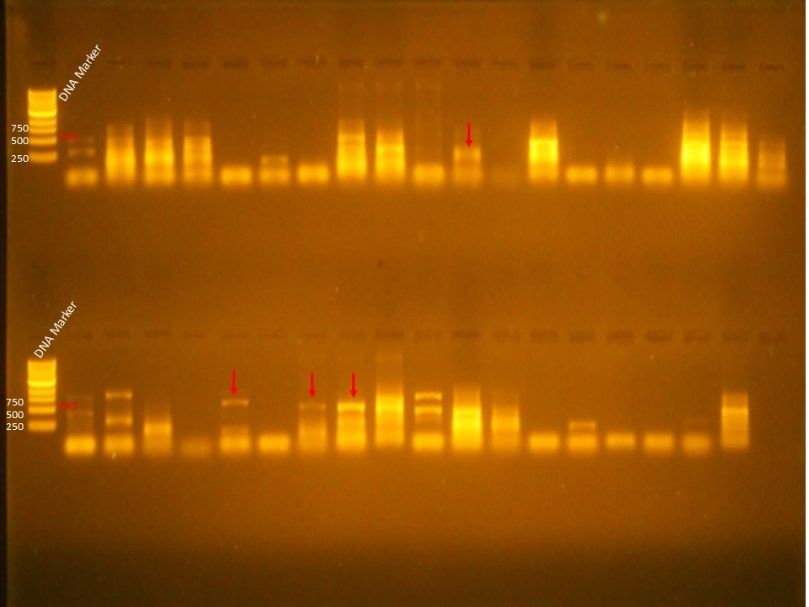 |
| **dfrA1** | **257** | 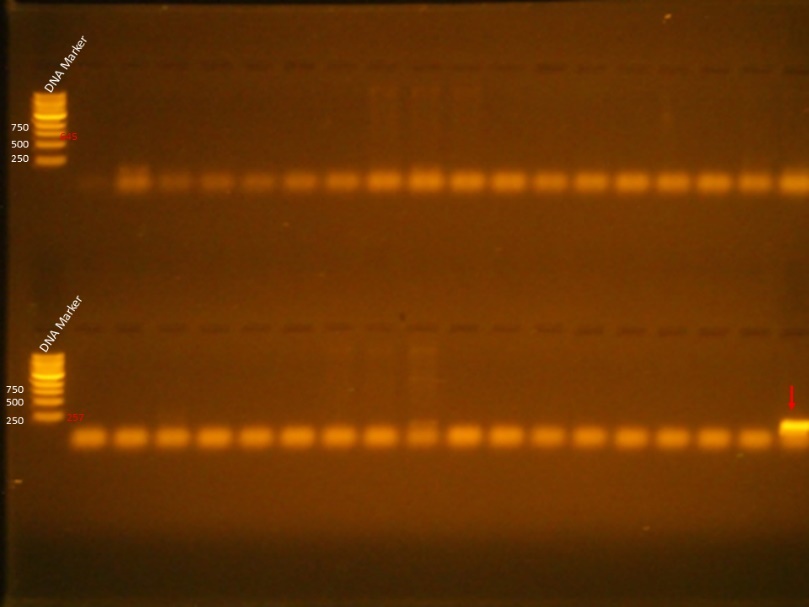 |
| **cat** | **540** | 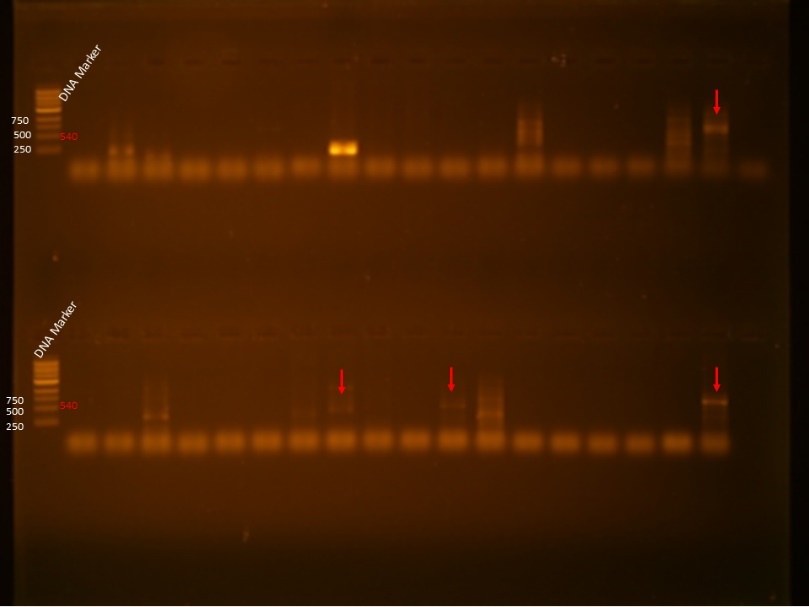 |

**
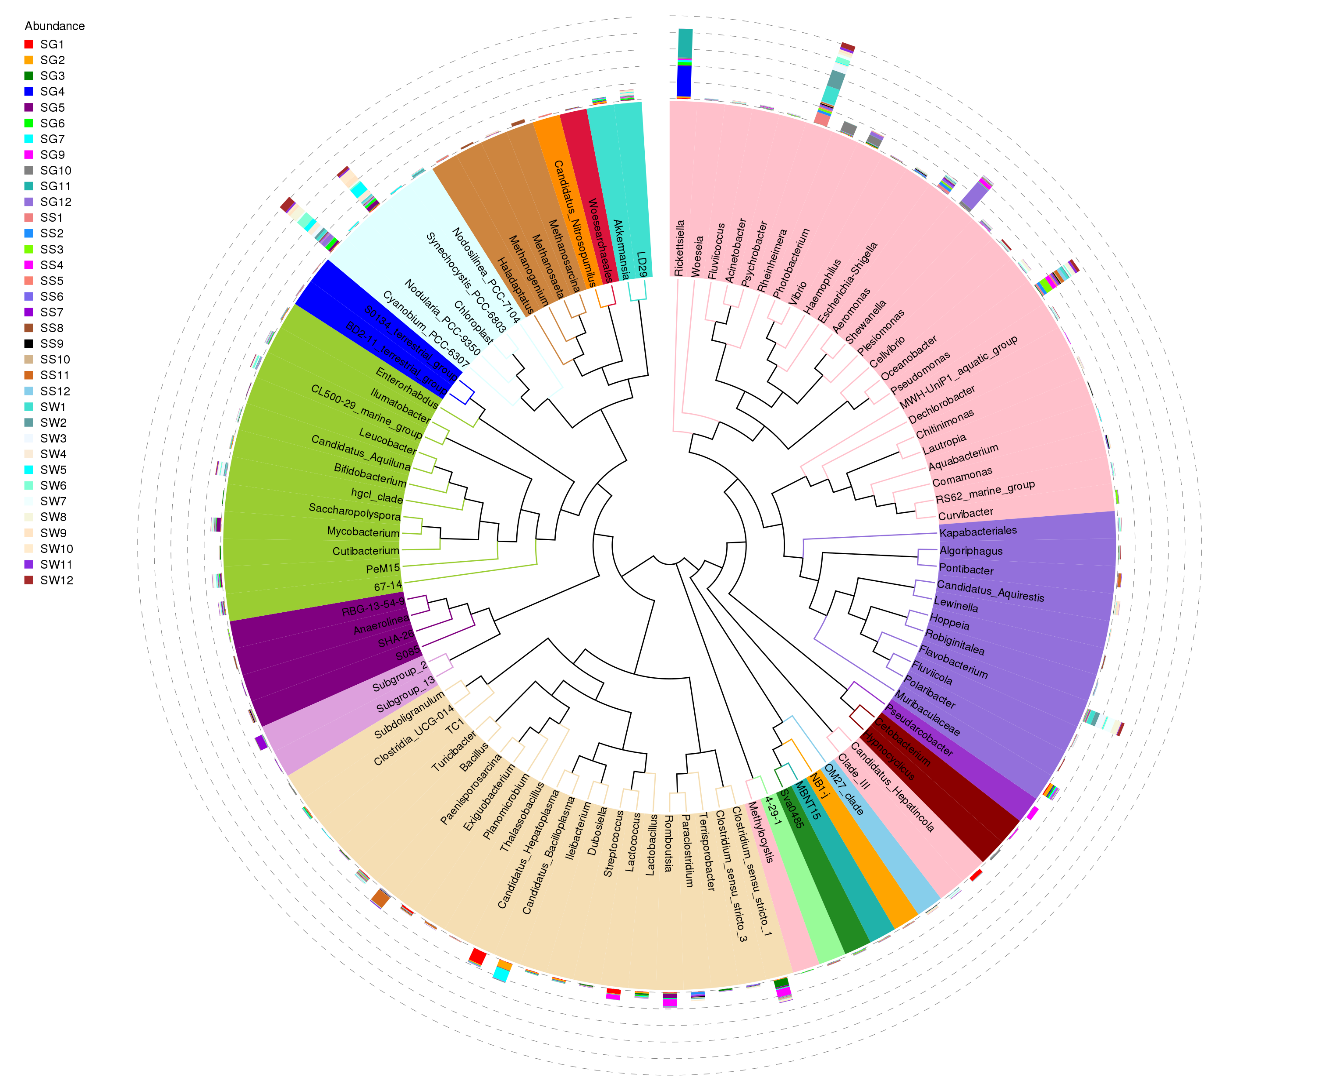
**

FIGURE S1: Evolutionary tree for all samples (gut, sediment, water) at genus level illustrating 100 genus


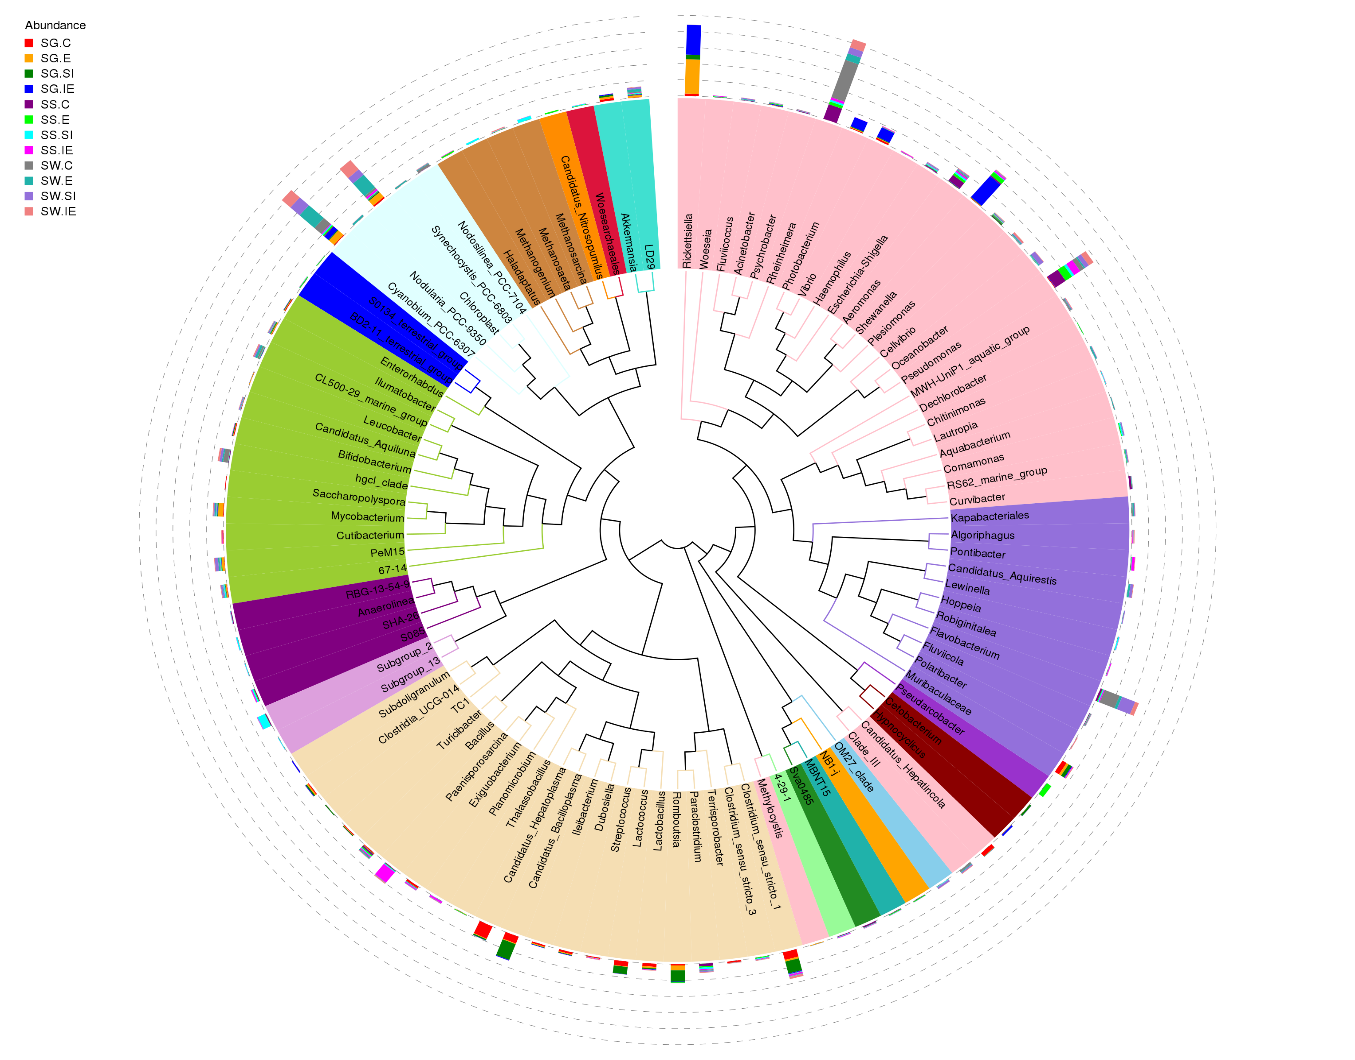


FIGURE S2: Evolutionary tree for four different farming systems at genus level illustrating 100 genus

**References**

1. Aftabuddin, S., Kader, A., Kamal, A. M., & Zafar, M. (2009). Present status on the use of antibiotics and chemicals in shrimp hatcheries and grow-out ponds and their environmental implications in Bangladesh. Aquaculture, Aquarium, Conservation & Legislation, 2(4), 369-379.
2. Hinchliffe, S., Butcher, A., & Rahman, M. M. (2018). The AMR problem: demanding economies, biological margins, and co-producing alternative strategies. Palgrave Communications, 4(1).
3. Shamsuzzaman, M. M., & Biswas, T. K. (2012). Aqua chemicals in shrimp farm: A study from south-west coast of Bangladesh. The Egyptian Journal of Aquatic Research, 38(4), 275-285.
4. Ali, H., Rahman, M. M., Rico, A., Jaman, A., Basak, S. K., Islam, M. M., ... & Mohan, C. V. (2018). An assessment of health management practices and occupational health hazards in tiger shrimp (Penaeus monodon) and freshwater prawn (Macrobrachium rosenbergii) aquaculture in Bangladesh. Veterinary and animal science, 5, 10-19.
5. Hossain, A., Nakamichi, S., Habibullah-Al-Mamun, M., Tani, K., Masunaga, S., & Matsuda, H. (2017). Occurrence, distribution, ecological and resistance risks of antibiotics in surface water of finfish and shellfish aquaculture in Bangladesh. Chemosphere, 188, 329-336.
6. Yasin, A., Begum, M. K., Eshik, M. M. E., Punom, N. J., Ahmmed, S., & Rahman, M. S. (2022). Molecular identification and antibiotic resistance patterns of diverse bacteria associated with shrimp PL nurseries of Bangladesh: suspecting Acinetobacter venetianus as future threat. PeerJ, 10, e12808
7. Rahman, M. S., Eshik, M. M. E., Punom, N. J., Abedin, M. M., & Begum, M. K. (2020). Diversity of Vibrio Species' and Their Antibiotic Resistance Patterns in Black Tiger Shrimp Penaeus monodon Fabricius, 1798 Cultured in South-West Region of Bangladesh. Asian Fisheries Science, 33(4).
8. Haque, M. M., Hossain, A., Mandal, S. C., Rahman, M. S., & Mahmud, Z. H. (2015). Prevalence, characterization and antibiotic susceptibility of Vibrio parahaemolyticus isolated from fishes and shellfishes of coastal regions of Bangladesh. Dhaka University Journal of Biological Sciences, 24(2), 121-129.
9. Khan, M., Paul, S. I., Rahman, M. M., & Lively, J. A. (2022). Antimicrobial Resistant Bacteria in Shrimp and Shrimp Farms of Bangladesh. Water, 14(19), 3172.
10. Neela, F. A., Rahman, M. A., Banu, M. N. A., Rahman, M. H., Ohta, H., & Alam, M. F. (2012). Occurrence of antibiotic resistant bacteria in some shrimp farms of Bangladesh. Bangladesh Journal of Botany, 41(2), 197-200.
11. Kehrenberg, C., & Schwarz, S. (2006). Distribution of florfenicol resistance genes fexA and cfr among chloramphenicol-resistant Staphylococcus isolates. Antimicrobial agents and chemotherapy, 50(4), 1156-1163.
12. Trieu-Cuot, P., De Cespedes, G., Bentorcha, F., Delbos, F., Gaspar, E., & Horaud, T. (1993). Study of heterogeneity of chloramphenicol acetyltransferase (CAT) genes in streptococci and enterococci by polymerase chain reaction: characterization of a new CAT determinant. Antimicrobial agents and chemotherapy, 37(12), 2593-2598
13. Kerrn, M. B., Klemmensen, T., Frimodt-Møller, N., & Espersen, F. (2002). Susceptibility of Danish Escherichia coli strains isolated from urinary tract infections and bacteraemia, and distribution of sul genes conferring sulphonamide resistance. Journal of antimicrobial chemotherapy, 50(4), 513-516.
14. Heuer, H., & Smalla, K. (2007). Manure and sulfadiazine synergistically increased bacterial antibiotic resistance in soil over at least two months. Environmental microbiology, 9(3), 657-666.
15. Cattoir, V., Poirel, L., Rotimi, V., Soussy, C. J., & Nordmann, P. (2007). Multiplex PCR for detection of plasmid-mediated quinolone resistance qnr genes in ESBL-producing enterobacterial isolates. Journal of antimicrobial chemotherapy, 60(2), 394-397.
16. Vila, J., Ruiz, J., Goni, P., Marcos, A., & Jimenez de Anta, T. (1995). Mutation in the gyrA gene of quinolone-resistant clinical isolates of Acinetobacter baumannii. Antimicrobial agents and chemotherapy, 39(5), 1201-1203.
17. Szczepanowski, R., Linke, B., Krahn, I., Gartemann, K. H., Gutzkow, T., Eichler, W., ... & Schluter, A. (2009). Detection of 140 clinically relevant antibiotic-resistance genes in the plasmid metagenome of wastewater treatment plant bacteria showing reduced susceptibility to selected antibiotics. Microbiology, 155(7), 2306-2319.
18. Wen, J. T., Zhou, Y., Yang, L., & Xu, Y. (2014). Multidrug-resistant genes of aminoglycoside-modifying enzymes and 16S rRNA methylases in Acinetobacter baumannii strains. Genet Mol Res, 13(2), 3842-9.
19. Ng, L. K., Martin, I., Alfa, M., & Mulvey, M. (2001). Multiplex PCR for the detection of tetracycline resistant genes. Molecular and cellular probes, 15(4), 209-215.
20. Melville, C. M., Scott, K. P., Mercer, D. K., & Flint, H. J. (2001). Novel tetracycline resistance gene, tet (32), in the Clostridium-related human colonic anaerobe K10 and its transmission in vitro to the rumen anaerobe Butyrivibrio fibrisolvens. Antimicrobial agents and chemotherapy, 45(11), 3246-3249.
21. Ma, L., Lin, C. J., Chen, J. H., Fung, C. P., Chang, F. Y., Lai, Y. K., ... & Siu, L. K. (2009). Widespread dissemination of aminoglycoside resistance genes armA and rmtB in Klebsiella pneumoniae isolates in Taiwan producing CTX-M-type extended-spectrum β-lactamases. Antimicrobial agents and chemotherapy, 53(1), 104-111.
22. Fasihi, Y., Saffari, F., Ghahraman, M. R. K., & Kalantar-Neyestanaki, D. (2017). Molecular detection of macrolide and lincosamide-resistance genes in clinical methicillin-resistant Staphylococcus aureus isolates from Kerman, Iran. Archives of Pediatric Infectious Diseases, 5(1).
23. El Ghachi, M., Bouhss, A., Blanot, D., & Mengin-Lecreulx, D. (2004). The bacA gene of Escherichia coli encodes an undecaprenyl pyrophosphate phosphatase activity. Journal of Biological Chemistry, 279(29), 30106-30113.
24. Miele, A., Bandera, M., & Goldstein, B. P. (1995). Use of primers selective for vancomycin resistance genes to determine van genotype in enterococci and to study gene organization in VanA isolates. Antimicrobial agents and chemotherapy, 39(8), 1772-1778.
25. Lee, J. C., Oh, J. Y., Cho, J. W., Park, J. C., Kim, J. M., Seol, S. Y., & Cho, D. T. (2001). The prevalence of trimethoprim-resistance-conferring dihydrofolate reductase genes in urinary isolates of Escherichia coli in Korea. Journal of Antimicrobial Chemotherapy, 47(5), 599-604.
